# Supplementary material for: A Novel Hypoxic lnc-RNA, HRL-SC, Promotes Proliferation and Migration of Human Dental Pulp Stem Cells Through PI3K/AKT Signalling Pathway
Source: Research Square preprint supplement (doi:10.21203/rs.3.rs-1143046/v1), 2021-12-13
Supplement: Supplementary file 1 [file c481460cc61a1ac5bface752.xlsx]

## Sheet: target
Query	Length_Query	Target	Length_Target	dG	ndG	Start_Position_Query	End_Position_Query	Start_Position_Target	End_Position_Target
MSTRG.8144.1	895	NREP	15	-5.02	-2.51	42	56	1	15
MSTRG.8144.1	895	NETO1	6	-4.56	-2.28	774	779	1	6
MSTRG.8144.1	895	GPI	28	-8.95	-1.79	7	34	1	28
MSTRG.8144.1	895	DIO2	19	-6.08	-0.8686	679	697	1	19
MSTRG.8144.1	895	HELLS	931	-38.39	-0.8346	803	895	1	93
MSTRG.8144.1	895	SCN1A	11	-4.97	-0.8283	746	756	1	11
MSTRG.8144.1	895	DOC2A	39	-7.14	-0.7933	418	456	1	39
MSTRG.8144.1	895	FCHO1	6	-3.83	-0.766	638	643	1	6
MSTRG.8144.1	895	SMIM1	15	-7.25	-0.725	311	325	1	15
MSTRG.8144.1	895	SMTN	15	-4.28	-0.7133	648	662	1	15
MSTRG.8144.1	895	FASN	56	-10.52	-0.7013	11	66	1	56
MSTRG.8144.1	895	PSPH	7	-4.14	-0.69	882	888	1	7
MSTRG.8144.1	895	RPS6KL1	26	-8.74	-0.6243	796	821	1	26
MSTRG.8144.1	895	GRB10	10	-2.41	-0.6025	722	731	1	10
MSTRG.8144.1	895	JUP	8	-2.96	-0.592	749	756	1	8
MSTRG.8144.1	895	DOCK8	151	-82.53	-0.5895	678	828	1	151
MSTRG.8144.1	895	TMEM144	31	-6.84	-0.57	2	32	1	31
MSTRG.8144.1	895	MVD	123	-27.94	-0.5373	568	690	1	123
MSTRG.8144.1	895	PDE4C	30	-7.81	-0.5207	829	858	1	30
MSTRG.8144.1	895	CENPK	69	-34.7	-0.5179	701	769	1	69
MSTRG.8144.1	895	AMDHD1	18	-8.2	-0.5125	318	335	1	18
MSTRG.8144.1	895	EEF1E1	168	-81.42	-0.5057	655	822	1	168
MSTRG.8144.1	895	HRH1	38	-6.55	-0.5038	290	327	1	38
MSTRG.8144.1	895	SORBS2	28	-8.65	-0.4806	794	821	1	28
MSTRG.8144.1	895	COL9A2	32	-10.07	-0.4795	690	721	1	32
MSTRG.8144.1	895	PLA2G4C	108	-50.29	-0.47	679	786	1	108
MSTRG.8144.1	895	PSMG1	36	-11.7	-0.468	793	828	1	36
MSTRG.8144.1	895	GRIN2A	59	-11.66	-0.4664	724	782	1	59
MSTRG.8144.1	895	TMPRSS5	32	-9.13	-0.4565	740	771	1	32
MSTRG.8144.1	895	FAM131B	30	-8.6	-0.4526	650	679	1	30
MSTRG.8144.1	895	RECQL4	42	-10.79	-0.4496	586	627	1	42
MSTRG.8144.1	895	EPM2A	378	-98.42	-0.4453	671	895	1	225
MSTRG.8144.1	895	PFKFB3	184	-79.91	-0.4415	642	825	1	184
MSTRG.8144.1	895	C12orf45	634	-37.67	-0.433	795	895	1	101
MSTRG.8144.1	895	SLC48A1	49	-8.63	-0.4315	713	761	1	49
MSTRG.8144.1	895	NDC80	505	-112.03	-0.4292	570	895	1	326
MSTRG.8144.1	895	IL31RA	211	-75.57	-0.4222	630	840	1	211
MSTRG.8144.1	895	SDC1	84	-18.05	-0.4198	293	376	1	84
MSTRG.8144.1	895	NXNL2	406	-86.93	-0.4179	678	895	1	218
MSTRG.8144.1	895	APCDD1	67	-16.58	-0.4145	666	732	1	67
MSTRG.8144.1	895	BLM	1240	-33.8	-0.4122	759	895	1	137
MSTRG.8144.1	895	PLCB1	103	-10.58	-0.4069	756	858	1	103
MSTRG.8144.1	895	SYTL2	300	-50.44	-0.4003	679	895	1	217
MSTRG.8144.1	895	SGK2	30	-9.81	-0.3924	658	687	1	30
MSTRG.8144.1	895	NR5A2	1129	-123.17	-0.3923	519	895	1	377
MSTRG.8144.1	895	FUT3	14	-4.31	-0.3918	870	883	1	14
MSTRG.8144.1	895	CCPG1	348	-85.15	-0.3888	675	895	1	221
MSTRG.8144.1	895	RAD51	193	-67.15	-0.3859	657	849	1	193
MSTRG.8144.1	895	AAMDC	154	-44.52	-0.3805	726	879	1	154
MSTRG.8144.1	895	ADCK1	367	-88.13	-0.3799	630	895	1	266
MSTRG.8144.1	895	BUB1B	289	-74.45	-0.3798	674	895	1	222
MSTRG.8144.1	895	MAP4K1	2499	-87.97	-0.3759	655	895	1	241
MSTRG.8144.1	895	CATSPERG	478	-80.78	-0.3757	628	895	1	268
MSTRG.8144.1	895	GALNT3	35	-4.49	-0.3742	817	851	1	35
MSTRG.8144.1	895	CSGALNACT1	43	-10.43	-0.3725	825	867	1	43
MSTRG.8144.1	895	GDF15	19	-6.67	-0.3706	581	599	1	19
MSTRG.8144.1	895	LRP8	2664	-94.29	-0.3683	626	895	1	270
MSTRG.8144.1	895	TMEM44	450	-84.8	-0.3624	635	895	1	261
MSTRG.8144.1	895	CALR	37	-7.58	-0.361	833	869	1	37
MSTRG.8144.1	895	PPIL6	789	-67.18	-0.3593	679	895	1	217
MSTRG.8144.1	895	MMP13	1467	-96	-0.3582	626	895	1	270
MSTRG.8144.1	895	GRIK2	1060	-73.73	-0.3579	674	895	1	222
MSTRG.8144.1	895	SYNE2	50	-13.24	-0.3578	713	762	1	50
MSTRG.8144.1	895	PPP5D1	513	-89.71	-0.356	622	895	1	274
MSTRG.8144.1	895	DRD2	22	-6.4	-0.3556	755	776	1	22
MSTRG.8144.1	895	EXO1	35	-7.09	-0.3545	638	672	1	35
MSTRG.8144.1	895	XYLB	1666	-110.95	-0.3545	567	895	1	329
MSTRG.8144.1	895	FRRS1L	21	-4.95	-0.3536	666	686	1	21
MSTRG.8144.1	895	LIPG	73	-12.32	-0.352	292	364	1	73
MSTRG.8144.1	895	EGLN1	474	-63.18	-0.351	676	895	1	220
MSTRG.8144.1	895	BCL11A	48	-8.42	-0.3508	540	587	1	48
MSTRG.8144.1	895	POLE	621	-38.89	-0.3504	735	895	1	161
MSTRG.8144.1	895	IL20RB	166	-49.61	-0.3494	698	863	1	166
MSTRG.8144.1	895	ALDH8A1	46	-11.54	-0.3394	677	722	1	46
MSTRG.8144.1	895	PRRT2	100	-15.27	-0.3393	710	809	1	100
MSTRG.8144.1	895	GPR132	30	-6.08	-0.3378	391	420	1	30
MSTRG.8144.1	895	SYT14	259	-69.03	-0.3351	583	841	1	259
MSTRG.8144.1	895	TNNT1	309	-68.71	-0.3335	679	895	1	217
MSTRG.8144.1	895	SLC37A1	56	-13.34	-0.3335	677	732	1	56
MSTRG.8144.1	895	C4orf3	198	-18.98	-0.333	805	895	1	91
MSTRG.8144.1	895	PCYT2	132	-21.44	-0.3298	679	810	1	132
MSTRG.8144.1	895	SHF	80	-12.01	-0.3246	670	749	1	80
MSTRG.8144.1	895	FANCD2	115	-28.98	-0.3185	734	848	1	115
MSTRG.8144.1	895	XKR9	376	-65.58	-0.3153	674	895	1	222
MSTRG.8144.1	895	APOD	324	-94.1	-0.3116	581	895	1	315
MSTRG.8144.1	895	VGLL3	81	-11.18	-0.3106	534	614	1	81
MSTRG.8144.1	895	SEMA4B	154	-19.9	-0.3062	591	744	1	154
MSTRG.8144.1	895	SLA	43	-8.54	-0.305	669	711	1	43
MSTRG.8144.1	895	SLC16A3	919	-91.88	-0.3032	582	895	1	314
MSTRG.8144.1	895	PLA2G10	390	-41.17	-0.3005	741	895	1	155
MSTRG.8144.1	895	NUSAP1	229	-43.83	-0.2982	710	895	1	186
MSTRG.8144.1	895	SKA3	105	-14.9	-0.298	679	783	1	105
MSTRG.8144.1	895	NRIP1	38	-8.02	-0.297	756	793	1	38
MSTRG.8144.1	895	TCTEX1D2	396	-56.63	-0.2965	679	895	1	217
MSTRG.8144.1	895	MAP3K7CL	133	-38.22	-0.294	702	834	1	133
MSTRG.8144.1	895	TBXA2R	1221	-94.41	-0.2905	544	895	1	352
MSTRG.8144.1	895	PCDH1	48	-10.31	-0.2864	826	873	1	48
MSTRG.8144.1	895	SLC3A2	73	-12.24	-0.2847	663	735	1	73
MSTRG.8144.1	895	ATP8B3	1686	-60.64	-0.2847	675	895	1	221
MSTRG.8144.1	895	DEPDC1B	66	-11.18	-0.2795	815	880	1	66
MSTRG.8144.1	895	PLAGL1	36	-6.65	-0.2771	837	872	1	36
MSTRG.8144.1	895	CPNE8	36	-5.67	-0.27	372	407	1	36
MSTRG.8144.1	895	RENBP	376	-82.59	-0.2699	496	871	1	376
MSTRG.8144.1	895	FAM160A1	40	-8.06	-0.2687	405	444	1	40
MSTRG.8144.1	895	PFKFB2	133	-34.14	-0.2667	710	842	1	133
MSTRG.8144.1	895	MCM4	79	-10.65	-0.2662	710	788	1	79
MSTRG.8144.1	895	CKB	57	-12.56	-0.2617	709	765	1	57
MSTRG.8144.1	895	PLK1	175	-14.57	-0.2602	788	895	1	108
MSTRG.8144.1	895	ENPP3	160	-38.07	-0.259	674	833	1	160
MSTRG.8144.1	895	PRSS16	277	-33.07	-0.2584	742	895	1	154
MSTRG.8144.1	895	CLDN7	299	-23.59	-0.2564	741	895	1	155
MSTRG.8144.1	895	BOC	115	-24.03	-0.2529	317	431	1	115
MSTRG.8144.1	895	ERMN	438	-50.37	-0.2506	679	895	1	217
MSTRG.8144.1	895	TFR2	504	-62.76	-0.25	613	895	1	283
MSTRG.8144.1	895	CDHR5	45	-9.91	-0.2477	625	669	1	45
MSTRG.8144.1	895	GIPR	52	-11.62	-0.2472	716	767	1	52
MSTRG.8144.1	895	TNC	69	-15.08	-0.2472	303	371	1	69
MSTRG.8144.1	895	CEP128	60	-9.39	-0.2471	793	852	1	60
MSTRG.8144.1	895	IDH2	114	-24.09	-0.2458	651	764	1	114
MSTRG.8144.1	895	APOL4	77	-14.5	-0.2458	711	787	1	77
MSTRG.8144.1	895	ATP2A1	70	-13.86	-0.2432	705	774	1	70
MSTRG.8144.1	895	TSEN15	139	-28.06	-0.2419	618	756	1	139
MSTRG.8144.1	895	SOCS3	47	-11.12	-0.2417	710	756	1	47
MSTRG.8144.1	895	MX1	77	-12.24	-0.24	666	742	1	77
MSTRG.8144.1	895	PCDH12	71	-14.03	-0.2378	669	739	1	71
MSTRG.8144.1	895	CAMKMT	418	-35.31	-0.237	742	895	1	154
MSTRG.8144.1	895	GFRA2	186	-22.28	-0.237	750	895	1	146
MSTRG.8144.1	895	RAD54L	90	-14.84	-0.2356	688	777	1	90
MSTRG.8144.1	895	EMID1	103	-17.79	-0.231	707	809	1	103
MSTRG.8144.1	895	KLF4	67	-11.27	-0.23	696	762	1	67
MSTRG.8144.1	895	MASP1	166	-11.95	-0.2298	806	895	1	90
MSTRG.8144.1	895	ASB5	60	-9.88	-0.2298	831	890	1	60
MSTRG.8144.1	895	ZNF726	268	-30.25	-0.2292	740	895	1	156
MSTRG.8144.1	895	IFRD1	53	-8.94	-0.2292	289	341	1	53
MSTRG.8144.1	895	PCK2	127	-20.51	-0.2279	656	782	1	127
MSTRG.8144.1	895	B4GALNT4	79	-17.07	-0.2276	681	759	1	79
MSTRG.8144.1	895	EDEM1	160	-20.69	-0.2249	785	895	1	111
MSTRG.8144.1	895	CYFIP2	304	-56.81	-0.2245	632	895	1	264
MSTRG.8144.1	895	GPR146	116	-19.4	-0.223	728	843	1	116
MSTRG.8144.1	895	CRISPLD2	56	-10.02	-0.2227	849	895	1	47
MSTRG.8144.1	895	TALDO1	151	-27.98	-0.2221	567	717	1	151
MSTRG.8144.1	895	COL25A1	84	-11.08	-0.2216	627	710	1	84
MSTRG.8144.1	895	MPP4	1302	-73.37	-0.221	560	895	1	336
MSTRG.8144.1	895	HMGCR	55	-9.89	-0.2198	707	761	1	55
MSTRG.8144.1	895	SYCE1L	73	-14.52	-0.2167	604	676	1	73
MSTRG.8144.1	895	SERPINA5	73	-14.55	-0.214	682	754	1	73
MSTRG.8144.1	895	YPEL3	90	-15.4	-0.2139	702	791	1	90
MSTRG.8144.1	895	FADS1	49	-9.4	-0.2136	679	727	1	49
MSTRG.8144.1	895	GDPD3	138	-15.56	-0.2132	635	772	1	138
MSTRG.8144.1	895	SLC1A5	87	-14.5	-0.2132	642	728	1	87
MSTRG.8144.1	895	CYSTM1	292	-28.03	-0.2123	696	895	1	200
MSTRG.8144.1	895	GALNTL6	184	-15.88	-0.2117	778	895	1	118
MSTRG.8144.1	895	CNTN1	172	-11.78	-0.2104	1	74	99	172
MSTRG.8144.1	895	TSPAN18	239	-26.06	-0.2102	733	895	1	163
MSTRG.8144.1	895	PPP1R13L	84	-14.46	-0.2096	679	762	1	84
MSTRG.8144.1	895	CRYM	77	-13.18	-0.2092	669	745	1	77
MSTRG.8144.1	895	PRR11	67	-9.56	-0.2078	724	790	1	67
MSTRG.8144.1	895	ESPL1	148	-26.67	-0.2052	590	737	1	148
MSTRG.8144.1	895	FSTL1	57	-8	-0.2051	851	895	1	45
MSTRG.8144.1	895	GPM6A	31	-4.92	-0.205	868	895	1	28
MSTRG.8144.1	895	CD4	136	-25.36	-0.2045	631	766	1	136
MSTRG.8144.1	895	ARL17A	423	-55.84	-0.2045	614	895	1	282
MSTRG.8144.1	895	RHBDD3	267	-49.6	-0.2041	630	895	1	266
MSTRG.8144.1	895	MFAP3L	134	-15.85	-0.2032	596	729	1	134
MSTRG.8144.1	895	DLGAP5	2526	-46.01	-0.2027	643	895	1	253
MSTRG.8144.1	895	IL11	120	-18.4	-0.2022	623	742	1	120
MSTRG.8144.1	895	C21orf58	136	-26.65	-0.2019	703	838	1	136
MSTRG.8144.1	895	COL4A1	87	-13.08	-0.2012	640	726	1	87
MSTRG.8144.1	895	LAMA3	109	-14.01	-0.1973	651	759	1	109
MSTRG.8144.1	895	SLC38A5	84	-11.4	-0.1966	734	817	1	84
MSTRG.8144.1	895	CCDC69	141	-18.46	-0.1964	679	819	1	141
MSTRG.8144.1	895	MYO15B	58	-10.91	-0.1948	275	332	1	58
MSTRG.8144.1	895	MXI1	112	-20.25	-0.1947	640	751	1	112
MSTRG.8144.1	895	RAC2	576	-44.95	-0.1946	631	895	1	265
MSTRG.8144.1	895	OXTR	130	-21.74	-0.1941	693	822	1	130
MSTRG.8144.1	895	SLC47A1	1759	-38.91	-0.1936	673	895	1	223
MSTRG.8144.1	895	MGAT3	325	-39.65	-0.1934	460	784	1	325
MSTRG.8144.1	895	DMKN	108	-19.34	-0.1915	663	770	1	108
MSTRG.8144.1	895	MYO15A	106	-15.68	-0.1912	659	764	1	106
MSTRG.8144.1	895	CHAC1	112	-19.85	-0.1909	665	776	1	112
MSTRG.8144.1	895	PPP4R4	171	-17.93	-0.1907	671	841	1	171
MSTRG.8144.1	895	TM4SF20	43	-7.2	-0.1895	840	882	1	43
MSTRG.8144.1	895	PCLO	135	-18.35	-0.1892	798	895	1	98
MSTRG.8144.1	895	SDSL	88	-14.51	-0.1884	367	454	1	88
MSTRG.8144.1	895	M6PR	75	-10.73	-0.1882	830	895	1	66
MSTRG.8144.1	895	MAP1LC3B	142	-16.16	-0.1879	636	777	1	142
MSTRG.8144.1	895	PAM	75	-10.33	-0.1878	384	458	1	75
MSTRG.8144.1	895	ASAH1	93	-10.97	-0.1859	668	760	1	93
MSTRG.8144.1	895	GLYATL1	151	-17.07	-0.1855	649	799	1	151
MSTRG.8144.1	895	MPV17L	157	-23.83	-0.1847	647	803	1	157
MSTRG.8144.1	895	HSPA9	126	-17.67	-0.1841	771	895	1	125
MSTRG.8144.1	895	HSD11B2	175	-30.5	-0.1837	586	760	1	175
MSTRG.8144.1	895	RORA	114	-17.39	-0.1831	651	764	1	114
MSTRG.8144.1	895	CD22	115	-17.21	-0.1831	627	741	1	115
MSTRG.8144.1	895	DLG4	155	-16.08	-0.1827	795	895	1	101
MSTRG.8144.1	895	RNF165	67	-10.05	-0.1827	709	775	1	67
MSTRG.8144.1	895	ERN1	210	-24.59	-0.1821	755	895	1	141
MSTRG.8144.1	895	IRF9	151	-19.25	-0.1816	618	768	1	151
MSTRG.8144.1	895	MTHFD2	112	-15.8	-0.1816	675	786	1	112
MSTRG.8144.1	895	CTSH	123	-21.6	-0.18	654	776	1	123
MSTRG.8144.1	895	ASF1B	144	-22.64	-0.1783	745	888	1	144
MSTRG.8144.1	895	CDKL4	174	-12.66	-0.1783	589	762	1	174
MSTRG.8144.1	895	ALG3	195	-28.14	-0.1781	532	726	1	195
MSTRG.8144.1	895	AIFM1	129	-17.98	-0.178	691	819	1	129
MSTRG.8144.1	895	ACKR4	61	-9.05	-0.1775	293	353	1	61
MSTRG.8144.1	895	MPP2	95	-15.02	-0.1767	662	756	1	95
MSTRG.8144.1	895	FAM86C1	160	-21.19	-0.1766	609	768	1	160
MSTRG.8144.1	895	MTRNR2L8	72	-10.52	-0.1753	271	342	1	72
MSTRG.8144.1	895	ASNS	85	-11.88	-0.1747	330	414	1	85
MSTRG.8144.1	895	NUPR1	129	-20.01	-0.174	741	869	1	129
MSTRG.8144.1	895	AIMP2	145	-18.12	-0.1726	613	757	1	145
MSTRG.8144.1	895	UCHL1	174	-21.05	-0.1725	516	689	1	174
MSTRG.8144.1	895	HSPA12A	99	-15.09	-0.1715	657	755	1	99
MSTRG.8144.1	895	GPRC5C	161	-22.6	-0.1712	744	895	1	152
MSTRG.8144.1	895	ANGPT1	91	-14.2	-0.1711	676	766	1	91
MSTRG.8144.1	895	CD72	497	-38.6	-0.1708	650	895	1	246
MSTRG.8144.1	895	HERPUD1	160	-22.47	-0.1702	615	774	1	160
MSTRG.8144.1	895	ISM2	216	-26.54	-0.1701	707	895	1	189
MSTRG.8144.1	895	GREM1	127	-19.43	-0.169	652	778	1	127
MSTRG.8144.1	895	MTRNR2L4	84	-10.54	-0.1673	684	767	1	84
MSTRG.8144.1	895	DIO1	175	-21.52	-0.1668	756	895	1	140
MSTRG.8144.1	895	TNFRSF25	136	-19.57	-0.1658	760	895	1	136
MSTRG.8144.1	895	GPR1	57	-7.06	-0.1642	312	368	1	57
MSTRG.8144.1	895	FGF11	304	-23.12	-0.164	636	895	1	260
MSTRG.8144.1	895	PEPD	123	-17.87	-0.1639	712	834	1	123
MSTRG.8144.1	895	PLCG2	133	-17.55	-0.1625	563	695	1	133
MSTRG.8144.1	895	TROAP	157	-17.69	-0.1623	587	743	1	157
MSTRG.8144.1	895	KCNG1	144	-19.4	-0.1617	650	793	1	144
MSTRG.8144.1	895	GGN	179	-23.9	-0.1615	591	769	1	179
MSTRG.8144.1	895	TVP23A	111	-14.2	-0.1614	640	750	1	111
MSTRG.8144.1	895	MYOZ3	262	-34.59	-0.1609	646	895	1	250
MSTRG.8144.1	895	ANGPTL4	257	-29.85	-0.1605	618	874	1	257
MSTRG.8144.1	895	PKMYT1	177	-21	-0.1603	618	794	1	177
MSTRG.8144.1	895	SYP	120	-16.98	-0.1602	644	763	1	120
MSTRG.8144.1	895	PIEZO2	93	-10.73	-0.1601	681	773	1	93
MSTRG.8144.1	895	AEBP1	196	-25.3	-0.1601	732	895	1	164
MSTRG.8144.1	895	TOP2A	81	-8.14	-0.1596	560	640	1	81
MSTRG.8144.1	895	TPI1	116	-15.46	-0.1594	578	693	1	116
MSTRG.8144.1	895	ESR1	132	-19.13	-0.1594	681	812	1	132
MSTRG.8144.1	895	ANLN	108	-15.52	-0.1584	761	868	1	108
MSTRG.8144.1	895	NEIL3	190	-22.32	-0.1572	609	798	1	190
MSTRG.8144.1	895	CPA4	87	-13.17	-0.1568	571	657	1	87
MSTRG.8144.1	895	ITGA7	102	-14.1	-0.1567	688	789	1	102
MSTRG.8144.1	895	NDRG1	128	-16.49	-0.1556	665	792	1	128
MSTRG.8144.1	895	ATP6V0D2	108	-13.82	-0.1553	685	792	1	108
MSTRG.8144.1	895	SLC35F6	166	-18.15	-0.1551	760	895	1	136
MSTRG.8144.1	895	ICAM5	236	-31	-0.155	584	819	1	236
MSTRG.8144.1	895	NRGN	235	-27.09	-0.1548	698	895	1	198
MSTRG.8144.1	895	ACADVL	118	-17.73	-0.1542	721	838	1	118
MSTRG.8144.1	895	GNPDA1	87	-11.54	-0.1539	626	712	1	87
MSTRG.8144.1	895	KCTD19	138	-18.29	-0.1537	660	797	1	138
MSTRG.8144.1	895	KEL	141	-21.44	-0.1531	316	456	1	141
MSTRG.8144.1	895	TMEM107	105	-15.29	-0.1529	662	766	1	105
MSTRG.8144.1	895	LRRTM2	114	-16.51	-0.1529	627	740	1	114
MSTRG.8144.1	895	PRC1	138	-15.88	-0.1527	384	521	1	138
MSTRG.8144.1	895	ZNF395	373	-34.66	-0.1527	664	895	1	232
MSTRG.8144.1	895	PTGS1	124	-16.16	-0.1525	643	766	1	124
MSTRG.8144.1	895	LONP1	258	-30	-0.1523	580	837	1	258
MSTRG.8144.1	895	TLR1	483	-19.94	-0.1522	721	895	1	175
MSTRG.8144.1	895	NTRK3	147	-17.75	-0.1517	640	786	1	147
MSTRG.8144.1	895	PRRG3	156	-18.01	-0.1513	676	831	1	156
MSTRG.8144.1	895	CENPM	174	-21.32	-0.1512	656	829	1	174
MSTRG.8144.1	895	ITGB4	187	-26.75	-0.1511	631	817	1	187
MSTRG.8144.1	895	COL4A2	238	-25.65	-0.1509	686	895	1	210
MSTRG.8144.1	895	SLC35B1	111	-15.84	-0.1509	654	764	1	111
MSTRG.8144.1	895	CDHR1	142	-14.47	-0.1507	338	479	1	142
MSTRG.8144.1	895	LBH	145	-12.43	-0.1498	617	761	1	145
MSTRG.8144.1	895	BAALC	163	-17.37	-0.1497	734	895	1	162
MSTRG.8144.1	895	SLC43A2	186	-24.52	-0.1495	666	851	1	186
MSTRG.8144.1	895	ACTG2	157	-19.98	-0.1491	742	895	1	154
MSTRG.8144.1	895	SPAG5	216	-25.01	-0.1489	542	757	1	216
MSTRG.8144.1	895	PRR5L	143	-19.64	-0.1488	639	781	1	143
MSTRG.8144.1	895	NEK2	1164	-24.81	-0.1486	725	895	1	171
MSTRG.8144.1	895	TSPAN9	178	-20.33	-0.1484	649	826	1	178
MSTRG.8144.1	895	NXPH4	109	-14.92	-0.1477	312	420	1	109
MSTRG.8144.1	895	CMTM1	85	-10.77	-0.1475	406	490	1	85
MSTRG.8144.1	895	RACGAP1	147	-11.5	-0.1474	641	787	1	147
MSTRG.8144.1	895	SLC6A16	99	-12.68	-0.1474	614	712	1	99
MSTRG.8144.1	895	PDIA3	214	-24.59	-0.1472	639	852	1	214
MSTRG.8144.1	895	CDK2	118	-15.85	-0.1468	610	727	1	118
MSTRG.8144.1	895	ATF7IP2	52	-4.99	-0.1468	689	740	1	52
MSTRG.8144.1	895	CDC45	220	-20.41	-0.1468	743	895	1	153
MSTRG.8144.1	895	ATRNL1	109	-13.06	-0.1467	713	821	1	109
MSTRG.8144.1	895	ACYP1	111	-12.76	-0.1467	625	735	1	111
MSTRG.8144.1	895	AURKB	723	-30.95	-0.1467	667	895	1	229
MSTRG.8144.1	895	TP53	90	-10.1	-0.1464	370	459	1	90
MSTRG.8144.1	895	PRR18	350	-38.48	-0.1463	516	865	1	350
MSTRG.8144.1	895	HMBS	145	-20.89	-0.1461	634	778	1	145
MSTRG.8144.1	895	UBE2C	151	-19.12	-0.146	674	824	1	151
MSTRG.8144.1	895	TMEM91	178	-18.18	-0.1454	762	895	1	134
MSTRG.8144.1	895	CAPN3	130	-15.23	-0.145	643	772	1	130
MSTRG.8144.1	895	PHGDH	190	-20.53	-0.1446	688	877	1	190
MSTRG.8144.1	895	COL3A1	267	-30.62	-0.1444	522	788	1	267
MSTRG.8144.1	895	PFKL	127	-16.28	-0.1441	668	794	1	127
MSTRG.8144.1	895	ASPDH	155	-19.01	-0.144	662	816	1	155
MSTRG.8144.1	895	CFTR	110	-12.38	-0.144	625	734	1	110
MSTRG.8144.1	895	SNAPC5	204	-24.81	-0.1434	587	790	1	204
MSTRG.8144.1	895	FAM153A	105	-9.18	-0.1434	563	667	1	105
MSTRG.8144.1	895	WNT7B	171	-23.78	-0.1433	637	807	1	171
MSTRG.8144.1	895	SQSTM1	220	-27.08	-0.1433	646	865	1	220
MSTRG.8144.1	895	SERPING1	130	-17.96	-0.1425	753	882	1	130
MSTRG.8144.1	895	PIANP	230	-26.64	-0.1425	567	796	1	230
MSTRG.8144.1	895	PTK6	402	-42.32	-0.1425	581	895	1	315
MSTRG.8144.1	895	SLC38A7	195	-25.04	-0.1423	610	804	1	195
MSTRG.8144.1	895	CCBE1	139	-18.3	-0.1419	651	789	1	139
MSTRG.8144.1	895	MTUS1	123	-16.32	-0.1419	578	700	1	123
MSTRG.8144.1	895	PFKFB4	114	-14.89	-0.1418	694	807	1	114
MSTRG.8144.1	895	ALDH1L1	141	-17.29	-0.1417	742	882	1	141
MSTRG.8144.1	895	SNCAIP	42	-4.53	-0.1416	307	348	1	42
MSTRG.8144.1	895	LDHA	136	-12.31	-0.1415	721	856	1	136
MSTRG.8144.1	895	LARP6	94	-12.59	-0.1415	720	813	1	94
MSTRG.8144.1	895	PFDN6	388	-27.16	-0.1415	649	895	1	247
MSTRG.8144.1	895	REC8	223	-20.34	-0.1412	721	895	1	175
MSTRG.8144.1	895	MFSD2B	133	-16.37	-0.1411	652	784	1	133
MSTRG.8144.1	895	MRPS24	216	-26.5	-0.141	616	831	1	216
MSTRG.8144.1	895	OXT	376	-35.79	-0.1409	594	895	1	302
MSTRG.8144.1	895	TMEM38B	107	-14.35	-0.1407	660	766	1	107
MSTRG.8144.1	895	RIC3	135	-18.68	-0.1405	628	762	1	135
MSTRG.8144.1	895	PPP1R32	529	-27.23	-0.1404	681	895	1	215
MSTRG.8144.1	895	ELN	181	-23.99	-0.1403	697	877	1	181
MSTRG.8144.1	895	RSPO2	114	-13.19	-0.1403	660	773	1	114
MSTRG.8144.1	895	TMC4	165	-18.59	-0.1398	656	820	1	165
MSTRG.8144.1	895	SPC24	627	-44.14	-0.1397	550	895	1	346
MSTRG.8144.1	895	MYO7A	222	-24.84	-0.1396	676	895	1	220
MSTRG.8144.1	895	NARF	111	-11.87	-0.1396	635	745	1	111
MSTRG.8144.1	895	CCDC116	458	-34.63	-0.1396	638	895	1	258
MSTRG.8144.1	895	FTH1	150	-18.28	-0.1395	626	775	1	150
MSTRG.8144.1	895	STOX2	118	-14.76	-0.1392	680	797	1	118
MSTRG.8144.1	895	LMTK3	204	-26.29	-0.1391	574	777	1	204
MSTRG.8144.1	895	NNAT	190	-21.68	-0.139	577	766	1	190
MSTRG.8144.1	895	CXCL14	297	-29.93	-0.1386	587	883	1	297
MSTRG.8144.1	895	ZP1	118	-13.99	-0.1385	320	437	1	118
MSTRG.8144.1	895	CDKN2B	234	-23.41	-0.1385	681	895	1	215
MSTRG.8144.1	895	FGF1	123	-15.34	-0.1382	647	769	1	123
MSTRG.8144.1	895	CCDC114	130	-14.48	-0.1379	667	796	1	130
MSTRG.8144.1	895	TCAP	430	-34.56	-0.1377	643	895	1	253
MSTRG.8144.1	895	BIRC5	154	-17.21	-0.1377	618	771	1	154
MSTRG.8144.1	895	TSHZ3	99	-11.98	-0.1377	570	668	1	99
MSTRG.8144.1	895	DOCK2	166	-15.68	-0.1375	637	802	1	166
MSTRG.8144.1	895	C19orf57	75	-9.75	-0.1373	776	850	1	75
MSTRG.8144.1	895	TUBE1	159	-17.96	-0.1371	751	895	1	145
MSTRG.8144.1	895	ABCB1	144	-12.56	-0.1365	730	873	1	144
MSTRG.8144.1	895	SSC5D	271	-35.71	-0.1363	600	870	1	271
MSTRG.8144.1	895	SLC2A1	129	-14.4	-0.1358	632	760	1	129
MSTRG.8144.1	895	VWA1	193	-22.25	-0.1357	694	886	1	193
MSTRG.8144.1	895	EGR3	213	-24.01	-0.1356	625	837	1	213
MSTRG.8144.1	895	EPHB6	151	-18.49	-0.135	711	861	1	151
MSTRG.8144.1	895	C4orf47	109	-12.68	-0.1349	616	724	1	109
MSTRG.8144.1	895	FAM149A	109	-13.21	-0.1348	605	713	1	109
MSTRG.8144.1	895	SLC16A14	54	-6.32	-0.1345	272	325	1	54
MSTRG.8144.1	895	MDGA1	388	-31.35	-0.1345	649	895	1	247
MSTRG.8144.1	895	NKAIN2	91	-10.22	-0.1345	650	740	1	91
MSTRG.8144.1	895	FDFT1	136	-16.12	-0.1343	735	870	1	136
MSTRG.8144.1	895	LOX	183	-13.88	-0.1335	752	895	1	144
MSTRG.8144.1	895	FN3KRP	151	-18.22	-0.133	735	885	1	151
MSTRG.8144.1	895	PDE11A	108	-12.37	-0.133	672	779	1	108
MSTRG.8144.1	895	TCTN2	181	-20.76	-0.1322	587	767	1	181
MSTRG.8144.1	895	FOLR3	224	-25.36	-0.1321	658	881	1	224
MSTRG.8144.1	895	MKNK2	229	-26.65	-0.1319	691	895	1	205
MSTRG.8144.1	895	STRC	354	-37.42	-0.1318	543	895	1	353
MSTRG.8144.1	895	GYS1	336	-23.42	-0.1316	679	895	1	217
MSTRG.8144.1	895	PRELID2	492	-21.84	-0.1316	725	895	1	171
MSTRG.8144.1	895	DNAJC12	120	-14.85	-0.1314	741	860	1	120
MSTRG.8144.1	895	CCDC113	192	-21.64	-0.1312	601	792	1	192
MSTRG.8144.1	895	HYOU1	114	-12.84	-0.131	643	756	1	114
MSTRG.8144.1	895	VAV3	156	-12.25	-0.1303	667	822	1	156
MSTRG.8144.1	895	CCNB1	184	-19.93	-0.1303	710	893	1	184
MSTRG.8144.1	895	ZWINT	144	-16.53	-0.1302	613	756	1	144
MSTRG.8144.1	895	LOXL2	303	-29.29	-0.1302	665	895	1	231
MSTRG.8144.1	895	MT3	205	-23.94	-0.1301	708	895	1	188
MSTRG.8144.1	895	BARD1	189	-21.96	-0.1299	635	823	1	189
MSTRG.8144.1	895	CARD14	250	-26.84	-0.1297	673	895	1	223
MSTRG.8144.1	895	KRT19	589	-33.3	-0.1291	557	895	1	339
MSTRG.8144.1	895	RNASEH2A	214	-24.91	-0.1291	684	895	1	212
MSTRG.8144.1	895	ARHGAP33	295	-28.34	-0.1288	615	895	1	281
MSTRG.8144.1	895	PGD	190	-22	-0.1287	547	736	1	190
MSTRG.8144.1	895	ESRRG	167	-17.63	-0.1287	738	895	1	158
MSTRG.8144.1	895	FICD	166	-20.04	-0.1285	616	781	1	166
MSTRG.8144.1	895	GAL3ST1	227	-27.69	-0.1282	593	819	1	227
MSTRG.8144.1	895	LCN12	271	-32.61	-0.1279	572	842	1	271
MSTRG.8144.1	895	C9orf116	207	-19.76	-0.1275	629	835	1	207
MSTRG.8144.1	895	TP53I11	188	-23.44	-0.1274	269	456	1	188
MSTRG.8144.1	895	TOX	1578	-30.57	-0.1274	644	895	1	252
MSTRG.8144.1	895	STAT4	76	-9.16	-0.1272	635	710	1	76
MSTRG.8144.1	895	CDCA5	207	-18.94	-0.1271	713	895	1	183
MSTRG.8144.1	895	MAD2L1	123	-11.94	-0.127	656	778	1	123
MSTRG.8144.1	895	YPEL4	165	-19.66	-0.1268	586	750	1	165
MSTRG.8144.1	895	CBLN2	324	-28.64	-0.1267	629	895	1	267
MSTRG.8144.1	895	GMFG	303	-27.19	-0.1265	661	895	1	235
MSTRG.8144.1	895	PLCD4	208	-21.62	-0.1264	704	895	1	192
MSTRG.8144.1	895	ITGA2	163	-18.93	-0.1262	727	889	1	163
MSTRG.8144.1	895	SLFN13	319	-17.9	-0.1261	642	895	1	254
MSTRG.8144.1	895	SLC16A12	76	-9.19	-0.1259	668	743	1	76
MSTRG.8144.1	895	CARHSP1	441	-30.94	-0.1258	619	895	1	277
MSTRG.8144.1	895	IL34	162	-17.83	-0.1256	713	874	1	162
MSTRG.8144.1	895	DGCR6	253	-26.2	-0.1254	662	895	1	234
MSTRG.8144.1	895	BMPER	805	-97.94	-0.1254	105	895	1	791
MSTRG.8144.1	895	KCTD15	185	-17.67	-0.1253	636	820	1	185
MSTRG.8144.1	895	GPX3	190	-22.41	-0.1252	695	884	1	190
MSTRG.8144.1	895	HJURP	366	-26.86	-0.1249	641	895	1	255
MSTRG.8144.1	895	ATAD2	189	-19.73	-0.1249	646	834	1	189
MSTRG.8144.1	895	FCRLA	424	-25.93	-0.1247	645	895	1	251
MSTRG.8144.1	895	SEL1L3	107	-12.09	-0.1246	668	774	1	107
MSTRG.8144.1	895	ANK2	159	-18.56	-0.1246	730	888	1	159
MSTRG.8144.1	895	DEPDC1	102	-8.59	-0.1245	683	784	1	102
MSTRG.8144.1	895	MIF4GD	123	-14.57	-0.1245	654	776	1	123
MSTRG.8144.1	895	RFC3	310	-18.9	-0.1243	664	895	1	232
MSTRG.8144.1	895	LAMA4	320	-30.21	-0.1243	557	876	1	320
MSTRG.8144.1	895	CLEC18A	200	-21.98	-0.1242	644	843	1	200
MSTRG.8144.1	895	PDGFA	259	-28.82	-0.1242	594	852	1	259
MSTRG.8144.1	895	GSN	199	-21.72	-0.1241	584	782	1	199
MSTRG.8144.1	895	PLEK2	381	-27.13	-0.1239	638	895	1	258
MSTRG.8144.1	895	VKORC1	129	-15.24	-0.1239	557	685	1	129
MSTRG.8144.1	895	SPATA4	228	-19.55	-0.1237	703	895	1	193
MSTRG.8144.1	895	SLC7A8	147	-15.94	-0.1236	709	855	1	147
MSTRG.8144.1	895	IDH1	221	-16.14	-0.1232	253	473	1	221
MSTRG.8144.1	895	ADA	225	-24.08	-0.1229	638	862	1	225
MSTRG.8144.1	895	ATP6V1H	1449	-29.7	-0.1222	626	895	1	270
MSTRG.8144.1	895	ATG16L2	293	-24.43	-0.1221	617	895	1	279
MSTRG.8144.1	895	DCN	300	-19.54	-0.1221	697	895	1	199
MSTRG.8144.1	895	TCF7	368	-36.22	-0.122	564	895	1	332
MSTRG.8144.1	895	CDK2AP2	183	-18.97	-0.1216	739	895	1	157
MSTRG.8144.1	895	DEGS2	162	-15.55	-0.1215	657	818	1	162
MSTRG.8144.1	895	XPOT	182	-19.54	-0.1214	291	472	1	182
MSTRG.8144.1	895	MCM5	172	-19.63	-0.1212	327	498	1	172
MSTRG.8144.1	895	PRSS21	244	-29.06	-0.1211	632	875	1	244
MSTRG.8144.1	895	ZNF763	139	-15.6	-0.1209	678	816	1	139
MSTRG.8144.1	895	FAM71E2	189	-22.13	-0.1203	691	879	1	189
MSTRG.8144.1	895	CNN1	350	-22.22	-0.1201	698	895	1	198
MSTRG.8144.1	895	ANK1	341	-26.15	-0.12	675	895	1	221
MSTRG.8144.1	895	AL354718.1	267	-27.19	-0.1198	547	813	1	267
MSTRG.8144.1	895	BTBD18	268	-30.45	-0.1194	562	829	1	268
MSTRG.8144.1	895	ENO1	100	-11.44	-0.1192	358	457	1	100
MSTRG.8144.1	895	NPC1	123	-10.84	-0.1191	734	856	1	123
MSTRG.8144.1	895	HIST2H2AA3	390	-27.01	-0.119	624	895	1	272
MSTRG.8144.1	895	PENK	317	-22.12	-0.1189	693	895	1	203
MSTRG.8144.1	895	HCFC1R1	294	-26.92	-0.1186	652	895	1	244
MSTRG.8144.1	895	FAM81A	175	-17.66	-0.1185	624	798	1	175
MSTRG.8144.1	895	PHF21B	413	-24.65	-0.1185	632	895	1	264
MSTRG.8144.1	895	ADM	418	-29.61	-0.1184	617	895	1	279
MSTRG.8144.1	895	CHTF18	310	-27.46	-0.1184	642	895	1	254
MSTRG.8144.1	895	CTNND2	544	-37.56	-0.1181	574	895	1	322
MSTRG.8144.1	895	SH3D21	328	-27.36	-0.1179	596	895	1	300
MSTRG.8144.1	895	KCNAB3	126	-13.68	-0.1179	596	721	1	126
MSTRG.8144.1	895	CLCN5	187	-16.02	-0.1178	630	816	1	187
MSTRG.8144.1	895	CA14	127	-13.77	-0.1177	651	777	1	127
MSTRG.8144.1	895	HSD17B12	172	-18.72	-0.1177	697	868	1	172
MSTRG.8144.1	895	TRPV3	165	-18.34	-0.1176	701	865	1	165
MSTRG.8144.1	895	LY6K	316	-23.97	-0.1175	641	895	1	255
MSTRG.8144.1	895	SLC1A2	165	-15.95	-0.1173	710	874	1	165
MSTRG.8144.1	895	VMO1	342	-33.6	-0.1171	562	895	1	334
MSTRG.8144.1	895	HMMR	305	-14.17	-0.1171	731	895	1	165
MSTRG.8144.1	895	MN1	312	-25.77	-0.1166	652	895	1	244
MSTRG.8144.1	895	SPSB2	247	-24.22	-0.1164	553	799	1	247
MSTRG.8144.1	895	PLIN1	219	-23.86	-0.1164	634	852	1	219
MSTRG.8144.1	895	DIRAS2	129	-13.27	-0.1164	558	686	1	129
MSTRG.8144.1	895	PRDM1	189	-18.61	-0.1163	689	877	1	189
MSTRG.8144.1	895	VAMP7	178	-20	-0.1163	609	786	1	178
MSTRG.8144.1	895	RNFT2	124	-12.88	-0.116	632	755	1	124
MSTRG.8144.1	895	C18orf54	106	-11.95	-0.116	631	736	1	106
MSTRG.8144.1	895	BOP1	396	-28.61	-0.1158	615	895	1	281
MSTRG.8144.1	895	KCNC3	132	-12.26	-0.1157	640	771	1	132
MSTRG.8144.1	895	PRIM1	1377	-53.97	-0.1156	383	895	1	513
MSTRG.8144.1	895	AL353791.1	118	-11.21	-0.1156	647	764	1	118
MSTRG.8144.1	895	CRABP2	248	-22.63	-0.1155	626	873	1	248
MSTRG.8144.1	895	MGP	219	-20.77	-0.1154	534	752	1	219
MSTRG.8144.1	895	MSTO1	232	-24.51	-0.1151	583	814	1	232
MSTRG.8144.1	895	YPEL1	357	-28.06	-0.115	610	895	1	286
MSTRG.8144.1	895	CENPI	135	-14.59	-0.1149	299	433	1	135
MSTRG.8144.1	895	HECW2	246	-22.33	-0.1145	633	878	1	246
MSTRG.8144.1	895	TRIB3	391	-29.35	-0.1142	619	895	1	277
MSTRG.8144.1	895	FOXM1	240	-23.95	-0.114	563	802	1	240
MSTRG.8144.1	895	SLC16A8	292	-32.22	-0.1139	582	873	1	292
MSTRG.8144.1	895	RASSF7	251	-24.59	-0.1138	671	895	1	225
MSTRG.8144.1	895	ADAMTS9	207	-17.17	-0.1137	738	895	1	158
MSTRG.8144.1	895	CENPA	259	-23.06	-0.1136	661	895	1	235
MSTRG.8144.1	895	WNT10B	306	-32.68	-0.1135	601	895	1	295
MSTRG.8144.1	895	PLEKHF1	246	-25.5	-0.1133	643	888	1	246
MSTRG.8144.1	895	MGAT4A	132	-10.31	-0.1133	615	746	1	132
MSTRG.8144.1	895	GUCA1A	382	-23.9	-0.1133	630	895	1	266
MSTRG.8144.1	895	DENND2A	473	-25.26	-0.1133	658	895	1	238
MSTRG.8144.1	895	BBC3	303	-29.99	-0.1132	614	895	1	282
MSTRG.8144.1	895	HSD17B6	226	-25.08	-0.113	650	875	1	226
MSTRG.8144.1	895	IKZF2	156	-12.38	-0.1125	604	759	1	156
MSTRG.8144.1	895	DCLRE1B	217	-19.67	-0.1124	555	771	1	217
MSTRG.8144.1	895	ALDH2	238	-26.41	-0.1124	648	885	1	238
MSTRG.8144.1	895	SPINT2	157	-15.6	-0.1122	631	787	1	157
MSTRG.8144.1	895	TRIOBP	313	-24.33	-0.1121	621	895	1	275
MSTRG.8144.1	895	CPLX1	330	-35.83	-0.112	466	795	1	330
MSTRG.8144.1	895	MMRN2	327	-26.51	-0.1119	628	895	1	268
MSTRG.8144.1	895	CYP46A1	151	-16.11	-0.1119	615	765	1	151
MSTRG.8144.1	895	RLBP1	213	-22.92	-0.1118	575	787	1	213
MSTRG.8144.1	895	COL8A1	341	-34.55	-0.1118	460	800	1	341
MSTRG.8144.1	895	FAM27A	202	-19.11	-0.1118	241	442	1	202
MSTRG.8144.1	895	WNT2	330	-28.43	-0.1115	622	895	1	274
MSTRG.8144.1	895	PLAU	319	-32.63	-0.1114	545	863	1	319
MSTRG.8144.1	895	BUB1	168	-13.12	-0.1112	541	708	1	168
MSTRG.8144.1	895	TCEA1	141	-14.44	-0.1111	202	342	1	141
MSTRG.8144.1	895	TEKT2	325	-32.93	-0.1109	575	895	1	321
MSTRG.8144.1	895	MGLL	232	-24.97	-0.1105	641	872	1	232
MSTRG.8144.1	895	MILR1	265	-22.37	-0.1102	651	895	1	245
MSTRG.8144.1	895	SHMT2	196	-21.47	-0.1101	265	460	1	196
MSTRG.8144.1	895	PTGES3L-AARSD1	156	-14.76	-0.1101	629	784	1	156
MSTRG.8144.1	895	ARHGAP26	289	-20.65	-0.1093	668	895	1	228
MSTRG.8144.1	895	ASTN2	291	-23.8	-0.1092	640	895	1	256
MSTRG.8144.1	895	ARHGEF2	389	-32.81	-0.109	594	895	1	302
MSTRG.8144.1	895	CAV3	454	-24.2	-0.109	657	895	1	239
MSTRG.8144.1	895	STAB1	529	-29.43	-0.109	502	895	1	394
MSTRG.8144.1	895	NOTCH3	348	-27.98	-0.1089	588	895	1	308
MSTRG.8144.1	895	TOR3A	292	-31.42	-0.1087	586	877	1	292
MSTRG.8144.1	895	MYCBP	168	-15.74	-0.1086	346	513	1	168
MSTRG.8144.1	895	RRM2	160	-14.43	-0.1085	373	532	1	160
MSTRG.8144.1	895	MUC1	255	-24.07	-0.1084	639	893	1	255
MSTRG.8144.1	895	PLLP	372	-32.53	-0.1084	589	895	1	307
MSTRG.8144.1	895	ENPP6	584	-29.81	-0.108	586	895	1	310
MSTRG.8144.1	895	OLFML1	169	-18.12	-0.1079	670	838	1	169
MSTRG.8144.1	895	CHEK1	332	-18.02	-0.1079	695	895	1	201
MSTRG.8144.1	895	TMEM178A	334	-28.48	-0.1079	534	867	1	334
MSTRG.8144.1	895	PLXNB3	772	-38.4	-0.1079	522	895	1	374
MSTRG.8144.1	895	VIM	328	-31.6	-0.1078	550	877	1	328
MSTRG.8144.1	895	SYNGR3	533	-35.09	-0.1076	531	895	1	365
MSTRG.8144.1	895	CXCL12	279	-21.4	-0.1075	674	895	1	222
MSTRG.8144.1	895	PTGES3L	381	-26.87	-0.1075	592	895	1	304
MSTRG.8144.1	895	SLC7A9	117	-10.96	-0.1075	765	881	1	117
MSTRG.8144.1	895	TXNRD1	417	-42.96	-0.1074	321	737	1	417
MSTRG.8144.1	895	RDH5	167	-17.38	-0.1073	579	745	1	167
MSTRG.8144.1	895	C6orf132	297	-27.24	-0.1072	475	771	1	297
MSTRG.8144.1	895	CENPW	202	-16.81	-0.1071	573	774	1	202
MSTRG.8144.1	895	C3	297	-19.25	-0.1069	643	895	1	253
MSTRG.8144.1	895	NDUFA4L2	261	-21.63	-0.1066	628	888	1	261
MSTRG.8144.1	895	RIMKLA	291	-24.06	-0.1065	635	895	1	261
MSTRG.8144.1	895	CDK18	217	-23.01	-0.1065	622	838	1	217
MSTRG.8144.1	895	NUDT14	288	-28.53	-0.1065	603	890	1	288
MSTRG.8144.1	895	COX6B2	264	-24.61	-0.1061	556	819	1	264
MSTRG.8144.1	895	NOX4	162	-15.58	-0.106	657	818	1	162
MSTRG.8144.1	895	PSMC3IP	255	-21.09	-0.106	495	749	1	255
MSTRG.8144.1	895	PPAN	291	-24.7	-0.106	623	895	1	273
MSTRG.8144.1	895	CPZ	208	-20.36	-0.106	693	895	1	203
MSTRG.8144.1	895	LGALS9	226	-22.97	-0.1059	635	860	1	226
MSTRG.8144.1	895	HSP90B1	160	-14.18	-0.1058	668	827	1	160
MSTRG.8144.1	895	TMPRSS6	213	-21.9	-0.1058	562	774	1	213
MSTRG.8144.1	895	PLEKHN1	529	-33.72	-0.1057	572	895	1	324
MSTRG.8144.1	895	RFX3	255	-22.2	-0.1057	640	894	1	255
MSTRG.8144.1	895	GLI1	388	-29.21	-0.1055	603	895	1	293
MSTRG.8144.1	895	MACROD2	295	-18.61	-0.1046	686	895	1	210
MSTRG.8144.1	895	SLC7A11	225	-21.31	-0.1045	689	895	1	207
MSTRG.8144.1	895	COL10A1	154	-12.62	-0.1043	706	859	1	154
MSTRG.8144.1	895	APCDD1L	240	-21.37	-0.1042	646	885	1	240
MSTRG.8144.1	895	PLEKHA2	748	-30.82	-0.1041	578	895	1	318
MSTRG.8144.1	895	TMTC2	106	-10.29	-0.1039	619	724	1	106
MSTRG.8144.1	895	NSMAF	162	-15.57	-0.1038	611	772	1	162
MSTRG.8144.1	895	TPD52	114	-11.11	-0.1038	310	423	1	114
MSTRG.8144.1	895	HSPB7	372	-24.27	-0.1037	626	895	1	270
MSTRG.8144.1	895	KISS1R	291	-29.23	-0.1037	557	847	1	291
MSTRG.8144.1	895	SCN5A	197	-20.29	-0.1035	572	768	1	197
MSTRG.8144.1	895	SPEF2	451	-17.49	-0.1035	688	895	1	208
MSTRG.8144.1	895	L1CAM	251	-20.35	-0.1033	477	727	1	251
MSTRG.8144.1	895	FOXRED2	259	-23.23	-0.1032	574	832	1	259
MSTRG.8144.1	895	TM4SF1	303	-24.72	-0.103	512	814	1	303
MSTRG.8144.1	895	TDP1	154	-14.1	-0.1029	612	765	1	154
MSTRG.8144.1	895	CHST11	217	-20.35	-0.1028	684	895	1	212
MSTRG.8144.1	895	CCDC110	198	-19.54	-0.1028	660	857	1	198
MSTRG.8144.1	895	PLCH2	333	-32.34	-0.1027	396	728	1	333
MSTRG.8144.1	895	SSX2IP	261	-16.64	-0.1027	698	895	1	198
MSTRG.8144.1	895	ESM1	269	-23.01	-0.1027	643	895	1	253
MSTRG.8144.1	895	POU5F1	369	-33.89	-0.1027	563	895	1	333
MSTRG.8144.1	895	GINS2	207	-16.62	-0.1026	655	861	1	207
MSTRG.8144.1	895	COL13A1	289	-29.28	-0.1024	547	835	1	289
MSTRG.8144.1	895	SYNPO2L	345	-22.94	-0.1024	659	895	1	237
MSTRG.8144.1	895	PLP1	368	-25.13	-0.1022	605	895	1	291
MSTRG.8144.1	895	SEMA4A	300	-26.34	-0.1021	632	895	1	264
MSTRG.8144.1	895	IGFALS	393	-36.4	-0.102	468	860	1	393
MSTRG.8144.1	895	ARHGEF37	310	-30.9	-0.102	563	872	1	310
MSTRG.8144.1	895	ALDH1A3	307	-28.88	-0.1017	607	895	1	289
MSTRG.8144.1	895	MTBP	199	-12.92	-0.1017	201	399	1	199
MSTRG.8144.1	895	CKLF-CMTM1	181	-15.83	-0.1015	640	820	1	181
MSTRG.8144.1	895	COL21A1	237	-20.39	-0.1014	614	850	1	237
MSTRG.8144.1	895	IGFBP3	426	-25.86	-0.1014	631	895	1	265
MSTRG.8144.1	895	ALPL	646	-30.8	-0.1013	490	895	1	406
MSTRG.8144.1	895	TACC2	523	-32.43	-0.1013	547	895	1	349
MSTRG.8144.1	895	SH3BGR	244	-19.76	-0.1013	691	895	1	205
MSTRG.8144.1	895	DBNDD1	234	-22.87	-0.1012	640	873	1	234
MSTRG.8144.1	895	ESR2	969	-33.06	-0.1011	559	895	1	337
MSTRG.8144.1	895	ASXL3	184	-15.36	-0.1011	616	799	1	184
MSTRG.8144.1	895	SORCS1	636	-29.42	-0.1008	566	895	1	330
MSTRG.8144.1	895	FBXO43	108	-9.78	-0.1008	532	639	1	108
MSTRG.8144.1	895	PDK1	463	-19.73	-0.1007	673	895	1	223
MSTRG.8144.1	895	CDKL2	174	-13.38	-0.1006	570	743	1	174
MSTRG.8144.1	895	LRRC17	313	-23.02	-0.1005	657	895	1	239
MSTRG.8144.1	895	DCC	306	-23.39	-0.1004	633	895	1	263
MSTRG.8144.1	895	CHRDL2	279	-24.06	-0.1002	598	876	1	279
MSTRG.8144.1	895	CANX	96	-8.92	-0.1002	595	690	1	96
